# Supplementary material for: ARNT is a potential direct HIF-1 target gene in human Hep3B hepatocellular carcinoma cells
Source: Springer Nature journal article supplement (doi:10.1186/s12935-017-0446-2), 2017-08-24
Supplement: MOESM1 [file 14239398]

region3

| RGEN Target (5' to 3')[?]    | Position[?] | Cleavage Position (%) [?] | Direction[?] | GC Contents (% w/o PAM)[?] | Out-of-frame Score[?] | Mismatches[?] |       |        |
|------------------------------|-------------|---------------------------|--------------|----------------------------|-----------------------|---------------|-------|--------|
|                              |             |                           |              |                            |                       | 0             | 1     | 2      |
| GTAATCCCAGCTTCTTGGGAGGCTGAGG | 3           | 4.7                       | -            | 56.0                       | N/A                   | 331           | 39814 | 127274 |
| CAGCCTCCCAAGAAGCTGGGATTACAGG | 6           | 15.9                      | +            | 56.0                       | N/A                   | 348           | 40249 | 129505 |
| ATGCCTGTAATCCCAGCTTCTTGGGAGG | 9           | 8.2                       | -            | 52.0                       | N/A                   | 115           | 11512 | 48940  |
| CGCATGCCTGTAATCCCAGCTTCTTGGG | 12          | 10.0                      | -            | 52.0                       | N/A                   | 23            | 2708  | 19362  |
| GCGCATGCCTGTAATCCCAGCTTCTTGG | 13          | 10.6                      | -            | 56.0                       | N/A                   | 44            | 5832  | 26253  |
| GATTACAGGCATGCGCCACCACGCCCGG | 25          | 27.1                      | +            | 64.0                       | 63.1                  | 1749          | 14825 | 56983  |
| AAAATACAAAATTAGCCGGGCGTGGTGG | 40          | 26.5                      | -            | 44.0                       | 64.3                  | 2076          | 10914 | 20748  |
| CTAAAAATACAAAATTAGCCGGGCGTGG | 43          | 28.2                      | -            | 40.0                       | 59.8                  | 1930          | 10092 | 17239  |
| CTCTACTAAAAATACAAAATTAGCCGGG | 48          | 31.2                      | -            | 28.0                       | 64.9                  | 12706         | 18066 | 11880  |
| TCTCTACTAAAAATACAAAATTAGCCGG | 49          | 31.8                      | -            | 24.0                       | 63.8                  | 12454         | 11593 | 6090   |
| GCTAATTTTGTATTTTAGTAGAGACGG  | 52          | 42.9                      | +            | 24.0                       | 69.3                  | 14214         | 12978 | 6775   |
| CTAATTTTGTATTTTAGTAGAGACGGG  | 53          | 43.5                      | +            | 24.0                       | 66.9                  | 11636         | 18083 | 15116  |
| TAATTTTGTATTTTAGTAGAGACGGGG  | 54          | 44.1                      | +            | 24.0                       | 62.9                  | 6590          | 19641 | 70951  |
| TAGTAGAGACGGGGTTTCGCCATGTTGG | 68          | 52.4                      | +            | 52.0                       | 61.0                  | 2727          | 44379 | 131540 |
| GAGACGGGGTTTCGCCATGTTGGCCAGG | 73          | 55.3                      | +            | 64.0                       | 62.6                  | 2532          | 36509 | 130603 |
| CGGGGTTTCGCCATGTTGGCCAGGCTGG | 77          | 57.6                      | +            | 68.0                       | 70.7                  | 2287          | 29726 | 111525 |
| GGGTTTCAAACACAGCCTGCCAACATGG | 87          | 54.1                      | -            | 60.0                       | 59.8                  | 39            | 2174  | 41581  |
| GTTGGCCAGGCTGGTTTCAAACCCCTGG | 91          | 65.9                      | +            | 64.0                       | 64.8                  | 8             | 206   | 4607   |
| TGTGGCCAGGGTTCAAACACAGCCTGG  | 96          | 59.4                      | -            | 64.0                       | 65.7                  | 1             | 8     | 395    |
| AGGCTGGTTTCAAACCCCTGGCCACAGG | 98          | 70.0                      | +            | 64.0                       | 60.0                  | 1             | 4     | 84     |
| TTCGAACCCCTGGCCACAGGTGATCCGG | 106         | 74.7                      | +            | 60.0                       | 56.9                  | 1             | 0     | 0      |
| AGGCGGCCGGATCACCTGTGGCCAGGGG | 112         | 68.8                      | -            | 72.0                       | 65.3                  | 1             | 0     | 4      |
| GAGGCGGCCGGATCACCTGTGGCCAGGG | 113         | 69.4                      | -            | 72.0                       | 64.2                  | 1             | 0     | 5      |
| CGAGGCGGCCGGATCACCTGTGGCCAGG | 114         | 70.0                      | -            | 76.0                       | 60.0                  | 1             | 1     | 67     |
| CTGGCCACAGGTGATCCGGCCGCTCGG  | 115         | 80.0                      | +            | 72.0                       | 57.9                  | 1             | 2     | 111    |
| GAGGCCGAGGGCCGGATCACCTGTGG   | 119         | 72.9                      | -            | 76.0                       | 56.4                  | 19            | 2330  | 17610  |
| CAGCACTTTGGGAGGCCGAGGCGGCCGG | 130         | 79.4                      | -            | 72.0                       | 53.7                  | 142           | 34180 | 101616 |
| CGGCCGCTCGGCCTCCCAAAGTGCTGG  | 131         | 89.4                      | +            | 76.0                       | N/A                   | 55            | 16960 | 64484  |
